# Supplementary material for: Effectiveness of Immunization against Paralytic Poliomyelitis in Nigeria
Source: Atypon-hosted journal article supplement (doi:10.1056/nejmoa0803259), 2008-10-15

## Supplementary Appendix

This appendix has been provided by the authors to give readers additional information about their work.

Supplement to: Jenkins HE, Aylward RB, Gasasira A, et al. Effectiveness of immunization against paralytic poliomyelitis in Nigeria. *N Engl J Med* 2008;359:1666-74.

# **The effectiveness of immunization against polio in Nigeria – Supplementary Material**

Helen E Jenkins<sup>1\*</sup>, R Bruce Aylward<sup>2</sup>, Alex Gasasira<sup>3</sup>, Christl A Donnelly<sup>1</sup>, Emmanuel A Abanida<sup>4</sup>, Titi Koleosho-Adelekan<sup>4</sup>, Nicholas C Grassly<sup>1</sup>

<sup>1</sup> MRC Centre for Outbreak Analysis and Modelling, Department of Infectious Disease Epidemiology, Faculty of Medicine, Imperial College London, London, UK

<sup>2</sup> Global Polio Eradication Initiative, WHO, Geneva, Switzerland

<sup>3</sup> WHO-Nigeria, UN House P.M.B. 2861, Abuja, Nigeria

<sup>4</sup> National Primary Health Care Development Agency Plot 681/682, Port Harcourt Crescent, off Gimbiya St, Area 11, Garki, Abuja, Nigeria

\*Author for correspondence: Miss Helen E Jenkins, MRC Centre for Outbreak Analysis and Modelling, Department of Infectious Disease Epidemiology, Faculty of Medicine, Imperial College London, London, UK. Email: [h.jenkins@imperial.ac.uk](mailto:h.jenkins@imperial.ac.uk)

## Supplementary Methods

### *Sensitivity of testing for poliovirus among Acute Flaccid Paralysis cases*

A method for evaluating the sensitivity of testing for poliovirus among Acute Flaccid Paralysis (AFP) cases with two stool samples was developed and published by Gary et al. in 1997<sup>1</sup> and is used in this paper. The method assumes that the laboratory test for poliovirus is 100% specific and that the sensitivities of the test for each stool are equal, which is a reasonable assumption provided that the time between collection of each sample is short (in AFP surveillance, the stool samples are typically collected between 24 and 48 hours apart and this was the case for 99% of AFP cases in our dataset). The maximum likelihood estimate of the sensitivity to detect poliovirus from a single stool is given by  $S = 2N_{11}/y$  and the prevalence of infection is  $y^2/(4N_{11}T)$ , where  $y = 2N_{11}+N_{10}+N_{01}$  = number of positive specimens,  $N_{10}$  = number of people whose first specimen was positive and the second was negative,  $N_{01}$  = number of people whose first specimen was negative and the second was positive,  $N_{11}$  = number of people with two positive specimens, and  $T$  = number of AFP cases. The person sensitivity was defined as the probability that at least one specimen from a child with polio will have a positive test result. As two specimens were collected, person sensitivity was the complement of the probability that both specimens were negative =  $1 - (1 - S)^2$ . The probability of misclassifying a case from the AFP database who was paralysed by wild poliovirus as a child without polio was therefore given by prevalence \* (1 – person sensitivity).

### *Conditional logistic regression of 1:1 matched cases and controls*

The probability that a child who has received  $m$  doses of monovalent oral polio vaccine against serotype 1 (mOPV1) and  $t$  doses of trivalent oral polio vaccine (tOPV) is protected against paralysis from type 1 poliovirus is:

$$p=1-(1-v_m)^m(1-v_t)^t \quad (\text{eq. 1})$$

Where  $v_m$  and  $v_t$  are the protective efficacies of mOPV1 and tOPV per dose received, respectively. The protective efficacies of mOPV1 and tOPV are estimated in the conditional logistic regression described in the main text which estimates the  $\ln(\text{odds})$  of paralysis as

$$\ln(\text{odds}) = \alpha m + \beta t + E$$

where  $v_m = 1 - e^{-\alpha}$  and  $v_t = 1 - e^{-\beta}$

and  $\alpha$  and  $\beta$  are the regression coefficients. Each matched case-control pair has a particular level of exposure to wild poliovirus,  $E$ , which is unknown and can be eliminated from the analysis by maximising the conditional likelihood.

To assess the validity of reporting a constant efficacy per dose received of tOPV, the estimated number of tOPV doses received was entered as a continuous and categorical variable in separate models and these models were compared via a likelihood ratio test. The same test was carried out to assess a constant efficacy per dose of mOPV1 although, due to the low numbers of mOPV1 doses received, rounding was to the nearest 0.5 dose (fractions of doses may be inferred when the estimated dose numbers is not equal to the number of immunization rounds to which a child was exposed).

Comparisons of the fit of the models with variable and constant efficacies per dose received showed that the constant efficacy per dose assumption was reasonable for both mOPV1 and tOPV (no significant difference in the goodness of fit assessed by the likelihood ratio,  $p=0.93$  and  $p=0.085$  respectively against type 1 and  $p=0.36$  for tOPV against type 3) (Supplementary Figure 2).

Under the assumption of a constant efficacy per dose of vaccine received, the probability of protection following multiple doses is estimated using (eq. 1). For example, if a child has received 2 doses of mOPV1 and 3 of tOPV then, using the efficacy estimates presented in the main text:

$$\text{Probability of protection} = p = 1 - (1 - 0.67)^2 (1 - 0.16)^3 = 0.94$$

#### *Estimation and analysis of vaccine coverage*

All non-polio acute flaccid paralysis (AFP) cases aged under 5 years reported in 2005 were categorised by the number of doses of oral polio vaccine (OPV) received (as reported by parents/carers): 0, 1-3 or >3 doses, state of residence and single years of age. This categorisation was carried out by total doses received to obtain estimates of coverage regardless of vaccine type. This resulted in 185 sets of proportions in each dose category ( $185 = 37 \text{ states} \times 5 \text{ age categories}$ ), represented by 185 vectors. The proportion of children in each of the three dose categories was estimated for each of the 6 geographic zones in Nigeria as a

weighted sum over age categories and states to reflect their underlying age distribution and population size<sup>2</sup>,

<sup>3</sup>. This process was repeated for non-polio AFP cases reported in 2007.

In order to calculate the variance of these weighted estimates, a variance-covariance matrix was calculated for each of the 185 vectors of proportions assuming that the proportions follow a multinomial distribution. From these, a weighted variance-covariance matrix was calculated for each of the 6 zones.

The differences in proportions between 2005 and 2007 in each zone were calculated by subtracting the 2005 vector of proportions from that for 2007 (for each zone in turn). The variance-covariance matrices for these difference vectors were calculated by adding the variance-covariance matrix for 2005 to that for 2007 (since  $\text{Var}(\mathbf{X}-\mathbf{Y})=\text{Var}(\mathbf{X})+\text{Var}(\mathbf{Y})$  assuming that the data from the two years are independent).

If there is no difference between two proportions X and Y, then the test statistic  $T = (X-Y)^2/(\text{Var}(X-Y))$  is asymptotically  $\chi^2$  distributed with 1 degree of freedom (under the assumption that the central limit theorem holds and expected values are all greater than 5). In this case we use the multidimensional equivalent  $T = \underline{\mathbf{d}}^T \underline{\mathbf{V}}^{-1} \underline{\mathbf{d}}$ , where  $\underline{\mathbf{d}}$  is the 3x1 vector of the differences in weighted proportions between 2005 and 2007 and  $\underline{\mathbf{V}}$  is the 3x3 weighted variance-covariance matrix of the differences. In this case the test statistic is asymptotically  $\chi^2$  distributed with 2 degrees of freedom (under the assumption that the central limit theorem holds and expected values are all greater than 5).

#### *Estimation of vaccine-induced population immunity*

The fraction of children protected against paralysis by type 1 poliovirus through directly administered OPV was calculated from the estimated coverage with tOPV and mOPV1, and the estimated efficacy of each of these vaccines. The estimated fraction of children unprotected by direct vaccination is given by

$$F = \frac{\sum_i n_i (1 - v_t)^{t_i} (1 - v_m)^{m_i}}{N} \quad (\text{eq. 2})$$

where:

$i$  = an index of unique combinations of doses received, there are a total of 520 different combinations of estimated numbers of mOPV1 and tOPV doses children received in 2007 since the method of estimation can result in fractions of doses (Note: that for years prior to the introduction of mOPV1,  $i$  is equal to the number of tOPV doses received)

$n_i$  = the number of children that have received the  $i^{\text{th}}$  combination of doses

$t_i$  = the estimated number of tOPV doses received in the  $i^{\text{th}}$  combination

$m_i$  = the estimated number of mOPV1 doses received in the  $i^{\text{th}}$  combination

$$N = \sum_i n_i$$

$\alpha$  and  $\beta$  are defined as above and the estimates of  $\alpha$  and  $\beta$  used are those estimated for the entire country since no evidence was found of regional variation

This quantity,  $F$ , is calculated for each of the five age groups within a state and an average of these five numbers is calculated weighting each number by the proportion of children in Nigeria under five that are in that age group, i.e.

$$\text{Fraction unprotected} = w_1F_1 + w_2F_2 + w_3F_3 + w_4F_4 + w_5F_5$$

Where  $F_1$  is the fraction protected in the age group 0-1 years and  $w_1$  is the fraction of the under-five population that are 0-1 years old<sup>2</sup>. The fraction unprotected in a zone then uses the fractions protected in each state and we calculate a weighted average using weights derived from the proportion of the population of the whole zone that are in each state<sup>3</sup>.

Vaccine-induced immunity is a function of both reported coverage and estimated efficacy of the monovalent and trivalent oral vaccines (eq. 2). Confidence intervals around the estimates of vaccine-induced immunity were derived using the Delta method. Assuming that the errors around each parameter in  $F$  are asymptotically normally distributed with mean 0 and known variance and that the Taylor expansion of  $F$  is dominated by the first-order terms, the variance around  $F$  is given by:

$$\text{Var}(F) = (\nabla F(\alpha, \beta, m_0, \dots, m_D, t_0, \dots, t_D, n_0, \dots, n_D))^T \Sigma (\nabla F(\alpha, \beta, m_0, \dots, m_D, t_0, \dots, t_D, n_0, \dots, n_D))$$

where  $\Sigma$  is the variance-covariance matrix of the parameters,  $D$  is the total number of doses reported to have been received and  $\delta F$  are the partial derivatives of  $F$  with respect to each parameter.  $\text{Var}(\alpha)$ ,  $\text{Var}(\beta)$  and  $\text{Cov}(\alpha, \beta)$  are all given directly from the conditional logistic regression.  $\text{Var}(m_i) = (m_i t_i) / (m_i + t_i)$ ,  $\text{Var}(t_i) = (m_i t_i) / (m_i + t_i)$  and  $\text{Cov}(m_i, t_i) = -(m_i t_i) / (m_i + t_i)$ , these variances and covariances assume that the probability that each dose that a child received has a fixed, constant probability of being either mOPV1 or tOPV over time and these probabilities follow a binomial distribution.  $\text{Var}(n_i) = N p_i (1 - p_i)$  where  $p_i = n_i / N$  and  $\text{Cov}(n_i, n_j) = -N p_i p_j$ , these variances and covariances assume that the number of children that receive a particular combination of doses follows a multinomial distribution. We assume the covariances  $\text{Cov}(\alpha, n_i)$ ,  $\text{Cov}(\beta, n_i)$ ,  $\text{Cov}(m_i, n_i)$  and  $\text{Cov}(t_i, n_i)$  are zero for all  $i$ . The variance of  $F$  was calculated for each of the 5 age groups in each of the 37 states and overall variances for each zone were calculated and weighted to match the underlying age distribution and population size<sup>2, 3</sup>.

#### *Sensitivity of estimated vaccine efficacy to routine coverage assumptions*

To test the assumption that all vaccine doses in our analysis were received from Supplementary Immunisation Activities (SIA) the first three reported doses of vaccine were assumed to be trivalent vaccine received through routine services among a randomly chosen proportion of AFP cases corresponding to reported routine coverage in the corresponding zone (21.4% in the North West, 28.3% in the North East and 36.0% in the North Central zone<sup>4</sup>). The remaining doses were assumed to have been received through SIA and the number of monovalent and trivalent vaccine doses calculated as described in the main text. Vaccine efficacy was calculated using conditional logistic regression as described above. This analysis was repeated 100 times and the percentiles for the estimated efficacy were recorded.

## References

1. Gary HE, Jr., Sanders R, Pallansch MA. A theoretical framework for evaluating the sensitivity of surveillance for detecting wild poliovirus: I. Factors affecting detection sensitivity in a person with acute flaccid paralysis. *The Journal of infectious diseases* 1997;175 Suppl 1:S135-40.
2. Demographic and Health Survey - Nigeria 2003. National Population Commission, Federal Republic of Nigeria,, 2003. (Accessed at <http://www.measuredhs.com/pubs/pdf/FR148/00FrontMatter.pdf>.)
3. Legal Notice on Publication of the 2006 Census Report. National Population Commission, Federal Republic of Nigeria,, 2007. (Accessed at [http://www.population.gov.ng/pop\\_figure.pdf](http://www.population.gov.ng/pop_figure.pdf).)
4. Centers for Disease Control and Prevention WHO, UNICEF, Dept For International Development,. National Immunisation Coverage Survey 2006; 2007.

**Supplementary Table 1a** Annual incidence of paralysis due to type 1 polio in Nigeria by state

| Zone                 | State       | Year      |            |            |            |            |            |            |           |            |
|----------------------|-------------|-----------|------------|------------|------------|------------|------------|------------|-----------|------------|
|                      |             | 2001      | 2002       | 2003       | 2004       | 2005       | 2006       | 2007       | 2007*     | 2008*      |
| North West           | Jigawa      | 2         | 10         | 12         | 39         | 54         | 102        | 6          | 0         | 22         |
|                      | Kaduna      | 1         | 27         | 7          | 78         | 67         | 35         | 5          | 2         | 13         |
|                      | Kano        | 7         | 45         | 31         | 144        | 118        | 304        | 10         | 0         | 55         |
|                      | Katsina     | 1         | 22         | 7          | 97         | 41         | 157        | 8          | 1         | 21         |
|                      | Kebbi       | 8         | 2          | 31         | 37         | 83         | 13         | 17         | 3         | 1          |
|                      | Sokoto      | 8         | 0          | 5          | 35         | 37         | 31         | 12         | 1         | 8          |
|                      | Zamfara     | 3         | 3          | 4          | 46         | 57         | 29         | 1          | 1         | 25         |
| <b>NORTH WEST</b>    |             | <b>30</b> | <b>109</b> | <b>97</b>  | <b>476</b> | <b>457</b> | <b>671</b> | <b>59</b>  | <b>8</b>  | <b>145</b> |
| North East           | Adamawa     | 0         | 0          | 1          | 1          | 2          | 1          | 2          | 0         | 1          |
|                      | Bauchi      | 1         | 14         | 25         | 40         | 46         | 82         | 16         | 9         | 15         |
|                      | Borno       | 1         | 8          | 6          | 13         | 11         | 24         | 21         | 5         | 12         |
|                      | Gombe       | 0         | 9          | 1          | 1          | 8          | 11         | 3          | 2         | 0          |
|                      | Taraba      | 0         | 0          | 1          | 4          | 3          | 1          | 2          | 1         | 2          |
|                      | Yobe        | 1         | 9          | 5          | 15         | 15         | 25         | 8          | 2         | 6          |
| <b>NORTH EAST</b>    |             | <b>3</b>  | <b>40</b>  | <b>39</b>  | <b>74</b>  | <b>85</b>  | <b>144</b> | <b>52</b>  | <b>19</b> | <b>36</b>  |
| North Central        | Benue       | 0         | 0          | 8          | 2          | 5          | 0          | 0          | 0         | 2          |
|                      | FCT         | 0         | 1          | 6          | 2          | 2          | 2          | 1          | 1         | 1          |
|                      | Kogi        | 0         | 2          | 9          | 3          | 2          | 0          | 1          | 1         | 0          |
|                      | Kwara       | 0         | 0          | 2          | 3          | 1          | 1          | 0          | 0         | 2          |
|                      | Nasarawa    | 0         | 16         | 4          | 1          | 8          | 7          | 0          | 0         | 3          |
|                      | Niger       | 2         | 6          | 3          | 13         | 10         | 17         | 3          | 1         | 6          |
|                      | Plateau     | 0         | 0          | 3          | 2          | 2          | 4          | 0          | 0         | 2          |
| <b>NORTH CENTRAL</b> |             | <b>2</b>  | <b>25</b>  | <b>35</b>  | <b>26</b>  | <b>30</b>  | <b>31</b>  | <b>5</b>   | <b>3</b>  | <b>16</b>  |
| South West           | Ekiti       | 0         | 0          | 0          | 0          | 0          | 0          | 0          | 0         | 0          |
|                      | Lagos       | 0         | 0          | 12         | 2          | 1          | 0          | 0          | 0         | 0          |
|                      | Ogun        | 0         | 0          | 3          | 2          | 0          | 0          | 0          | 0         | 0          |
|                      | Ondo        | 0         | 0          | 0          | 1          | 0          | 0          | 0          | 0         | 0          |
|                      | Osun        | 0         | 0          | 0          | 2          | 0          | 0          | 0          | 0         | 0          |
|                      | Oyo         | 0         | 0          | 4          | 6          | 0          | 0          | 0          | 0         | 3          |
| <b>SOUTH WEST</b>    |             | <b>0</b>  | <b>0</b>   | <b>19</b>  | <b>13</b>  | <b>1</b>   | <b>0</b>   | <b>0</b>   | <b>0</b>  | <b>3</b>   |
| South South          | Akwa Ibom   | 0         | 0          | 0          | 0          | 0          | 0          | 0          | 0         | 0          |
|                      | Bayelsa     | 0         | 0          | 0          | 4          | 0          | 0          | 0          | 0         | 0          |
|                      | Cross River | 0         | 0          | 0          | 1          | 0          | 0          | 0          | 0         | 0          |
|                      | Delta       | 0         | 0          | 0          | 3          | 0          | 0          | 0          | 0         | 0          |
|                      | Edo         | 0         | 0          | 0          | 0          | 0          | 0          | 0          | 0         | 0          |
|                      | Rivers      | 0         | 0          | 0          | 0          | 0          | 0          | 0          | 0         | 0          |
| <b>SOUTH SOUTH</b>   |             | <b>0</b>  | <b>0</b>   | <b>0</b>   | <b>0</b>   | <b>0</b>   | <b>0</b>   | <b>0</b>   | <b>0</b>  | <b>0</b>   |
| South East           | Abia        | 0         | 0          | 0          | 0          | 0          | 0          | 0          | 0         | 0          |
|                      | Anambra     | 0         | 0          | 0          | 1          | 0          | 0          | 0          | 0         | 0          |
|                      | Ebonyi      | 0         | 0          | 0          | 0          | 0          | 0          | 0          | 0         | 0          |
|                      | Enugu       | 0         | 0          | 0          | 0          | 0          | 0          | 0          | 0         | 0          |
|                      | Imo         | 0         | 0          | 0          | 0          | 0          | 0          | 0          | 0         | 0          |
| <b>SOUTH EAST</b>    |             | <b>0</b>  | <b>0</b>   | <b>0</b>   | <b>0</b>   | <b>0</b>   | <b>0</b>   | <b>0</b>   | <b>0</b>  | <b>0</b>   |
| <b>Whole country</b> |             | <b>35</b> | <b>174</b> | <b>190</b> | <b>598</b> | <b>573</b> | <b>846</b> | <b>116</b> | <b>30</b> | <b>200</b> |

\*Numbers are as of 18 May of that year

**Supplementary Table 1b** Annual incidence of paralysis due to type 3 polio in Nigeria by state

| Zone                 | State       | Year      |           |            |            |            |            |            |           |           |
|----------------------|-------------|-----------|-----------|------------|------------|------------|------------|------------|-----------|-----------|
|                      |             | 2001      | 2002      | 2003       | 2004       | 2005       | 2006       | 2007       | 2007*     | 2008*     |
| North West           | Jigawa      | 0         | 6         | 17         | 12         | 29         | 30         | 27         | 17        | 1         |
|                      | Kaduna      | 0         | 0         | 16         | 15         | 16         | 18         | 2          | 2         | 0         |
|                      | Kano        | 2         | 6         | 57         | 40         | 109        | 51         | 49         | 29        | 2         |
|                      | Katsina     | 1         | 2         | 32         | 13         | 38         | 22         | 16         | 9         | 1         |
|                      | Kebbi       | 0         | 0         | 12         | 17         | 9          | 59         | 10         | 7         | 0         |
|                      | Sokoto      | 1         | 3         | 5          | 6          | 16         | 11         | 13         | 9         | 0         |
|                      | Zamfara     | 1         | 0         | 1          | 29         | 8          | 20         | 4          | 0         | 2         |
| <b>NORTH WEST</b>    |             | <b>5</b>  | <b>17</b> | <b>140</b> | <b>132</b> | <b>225</b> | <b>211</b> | <b>121</b> | <b>73</b> | <b>6</b>  |
| North East           | Adamawa     | 0         | 0         | 0          | 1          | 1          | 0          | 1          | 0         | 0         |
|                      | Bauchi      | 0         | 2         | 11         | 10         | 12         | 18         | 12         | 7         | 1         |
|                      | Borno       | 5         | 5         | 0          | 18         | 1          | 20         | 5          | 2         | 0         |
|                      | Gombe       | 0         | 1         | 0          | 3          | 1          | 4          | 0          | 0         | 0         |
|                      | Taraba      | 0         | 0         | 0          | 1          | 0          | 1          | 1          | 0         | 2         |
|                      | Yobe        | 0         | 0         | 3          | 5          | 5          | 16         | 10         | 3         | 0         |
| <b>NORTH EAST</b>    |             | <b>5</b>  | <b>8</b>  | <b>14</b>  | <b>38</b>  | <b>20</b>  | <b>59</b>  | <b>29</b>  | <b>12</b> | <b>3</b>  |
| North Central        | Benue       | 5         | 0         | 1          | 0          | 0          | 0          | 1          | 1         | 0         |
|                      | FCT         | 2         | 1         | 3          | 0          | 3          | 0          | 0          | 0         | 0         |
|                      | Kogi        | 0         | 0         | 0          | 0          | 1          | 0          | 0          | 0         | 0         |
|                      | Kwara       | 1         | 0         | 1          | 2          | 0          | 0          | 1          | 0         | 0         |
|                      | Nasarawa    | 1         | 0         | 0          | 1          | 2          | 0          | 3          | 2         | 0         |
|                      | Niger       | 0         | 2         | 1          | 4          | 2          | 5          | 2          | 1         | 1         |
|                      | Plateau     | 0         | 0         | 2          | 2          | 0          | 1          | 2          | 1         | 1         |
| <b>NORTH CENTRAL</b> |             | <b>9</b>  | <b>3</b>  | <b>8</b>   | <b>9</b>   | <b>8</b>   | <b>6</b>   | <b>9</b>   | <b>5</b>  | <b>2</b>  |
| South West           | Ekiti       | 0         | 0         | 0          | 0          | 0          | 0          | 0          | 0         | 0         |
|                      | Lagos       | 1         | 0         | 0          | 0          | 0          | 0          | 4          | 0         | 0         |
|                      | Ogun        | 0         | 0         | 1          | 0          | 0          | 0          | 0          | 0         | 3         |
|                      | Ondo        | 0         | 0         | 0          | 0          | 0          | 0          | 0          | 0         | 0         |
|                      | Osun        | 0         | 0         | 0          | 0          | 0          | 0          | 0          | 0         | 0         |
|                      | Oyo         | 0         | 0         | 0          | 1          | 0          | 0          | 6          | 0         | 6         |
| <b>SOUTH WEST</b>    |             | <b>1</b>  | <b>0</b>  | <b>1</b>   | <b>1</b>   | <b>0</b>   | <b>0</b>   | <b>10</b>  | <b>0</b>  | <b>9</b>  |
| South South          | Akwa Ibom   | 1         | 0         | 0          | 0          | 0          | 0          | 0          | 0         | 0         |
|                      | Bayelsa     | 0         | 0         | 0          | 0          | 0          | 0          | 0          | 0         | 0         |
|                      | Cross River | 0         | 0         | 0          | 0          | 0          | 0          | 0          | 0         | 0         |
|                      | Delta       | 0         | 0         | 0          | 0          | 0          | 0          | 0          | 0         | 0         |
|                      | Edo         | 0         | 0         | 0          | 0          | 0          | 0          | 0          | 0         | 0         |
|                      | Rivers      | 0         | 0         | 0          | 0          | 0          | 0          | 1          | 1         | 0         |
| <b>SOUTH SOUTH</b>   |             | <b>1</b>  | <b>0</b>  | <b>0</b>   | <b>0</b>   | <b>0</b>   | <b>0</b>   | <b>1</b>   | <b>1</b>  | <b>0</b>  |
| South East           | Abia        | 0         | 0         | 0          | 0          | 0          | 0          | 0          | 0         | 0         |
|                      | Anambra     | 0         | 0         | 0          | 0          | 0          | 0          | 0          | 0         | 0         |
|                      | Ebonyi      | 0         | 0         | 0          | 0          | 0          | 0          | 0          | 0         | 0         |
|                      | Enugu       | 0         | 0         | 0          | 1          | 0          | 0          | 0          | 0         | 0         |
|                      | Imo         | 0         | 0         | 0          | 0          | 0          | 0          | 0          | 0         | 0         |
| <b>SOUTH EAST</b>    |             | <b>0</b>  | <b>0</b>  | <b>0</b>   | <b>1</b>   | <b>0</b>   | <b>0</b>   | <b>0</b>   | <b>0</b>  | <b>0</b>  |
| <b>Whole country</b> |             | <b>21</b> | <b>28</b> | <b>163</b> | <b>181</b> | <b>253</b> | <b>276</b> | <b>170</b> | <b>91</b> | <b>20</b> |

\*Numbers are as of 18 May of that year

**Supplementary Table 1c** Annual incidence of paralysis due to type 1 polio in Nigeria by age at onset of paralysis

| Age (years) | Year    |         |         |          |          |          |         |        |         |
|-------------|---------|---------|---------|----------|----------|----------|---------|--------|---------|
|             | 2001    | 2002    | 2003    | 2004     | 2005     | 2006     | 2007    | 2007*  | 2008*   |
|             | N (%)   | N (%)   | N (%)   | N (%)    | N (%)    | N (%)    | N (%)   | N (%)  | N (%)   |
| 0-1         | 2 (6)   | 15 (9)  | 21 (11) | 35 (6)   | 30 (5)   | 25 (3)   | 5 (4)   | 3 (10) | 4 (2)   |
| 1-2         | 8 (23)  | 66 (38) | 85 (45) | 247 (41) | 207 (36) | 275 (33) | 34 (29) | 6 (20) | 55 (28) |
| 2-3         | 11 (31) | 47 (27) | 46 (24) | 162 (27) | 181 (32) | 279 (33) | 29 (25) | 9 (30) | 64 (32) |
| 3-4         | 6 (17)  | 29 (17) | 24 (13) | 71 (12)  | 51 (9)   | 120 (14) | 17 (15) | 8 (27) | 38 (19) |
| 4-5         | 5 (14)  | 8 (5)   | 7 (4)   | 21 (4)   | 24 (4)   | 37 (4)   | 6 (5)   | 2 (7)  | 9 (5)   |
| >5          | 3 (9)   | 9 (5)   | 6 (3)   | 24 (4)   | 19 (3)   | 31 (4)   | 2 (2)   | 0 (0)  | 3 (2)   |
| Missing     | 0 (0)   | 0 (0)   | 1 (1)   | 38 (6)   | 61 (11)  | 79 (9)   | 23 (20) | 2 (7)  | 27 (14) |
| Total       | 35      | 174     | 190     | 598      | 573      | 846      | 116     | 30     | 200     |

\*Numbers are as of 18 May of that year

**Supplementary Table 1d** Annual incidence of paralysis due to type 3 polio in Nigeria by age at onset of paralysis

| Age (years) | Year    |        |         |         |         |         |         |         |        |
|-------------|---------|--------|---------|---------|---------|---------|---------|---------|--------|
|             | 2001    | 2002   | 2003    | 2004    | 2005    | 2006    | 2007    | 2007*   | 2008*  |
|             | N (%)   | N (%)  | N (%)   | N (%)   | N (%)   | N (%)   | N (%)   | N (%)   | N (%)  |
| 0-1         | 1 (5)   | 1 (4)  | 18 (11) | 14 (8)  | 9 (4)   | 5 (2)   | 8 (5)   | 3 (3)   | 0 (0)  |
| 1-2         | 11 (52) | 9 (32) | 56 (34) | 51 (28) | 85 (34) | 76 (28) | 51 (30) | 27 (30) | 6 (30) |
| 2-3         | 6 (29)  | 8 (29) | 43 (26) | 53 (29) | 95 (38) | 92 (33) | 51 (30) | 27 (30) | 7 (35) |
| 3-4         | 2 (10)  | 5 (18) | 25 (15) | 34 (19) | 32 (13) | 30 (11) | 23 (14) | 19 (21) | 1 (5)  |
| 4-5         | 0 (0)   | 2 (7)  | 9 (6)   | 12 (7)  | 9 (4)   | 16 (6)  | 11 (7)  | 5 (5)   | 0 (0)  |
| >5          | 1 (5)   | 3 (11) | 12 (7)  | 8 (4)   | 12 (5)  | 14 (5)  | 10 (6)  | 5 (5)   | 3 (15) |
| Missing     | 0 (0)   | 0 (0)  | 0 (0)   | 9 (5)   | 11 (4)  | 43 (16) | 16 (9)  | 5 (5)   | 3 (15) |
| Total       | 21      | 28     | 163     | 181     | 253     | 276     | 170     | 91      | 20     |

\*Numbers are as of 18 May of that year

**Supplementary Table 2** Supplementary Immunisation Activities (SIA) by date, vaccine type used and location

| Date           | Vaccine type | Areas included                                                                                                                        |
|----------------|--------------|---------------------------------------------------------------------------------------------------------------------------------------|
| January 2001   | tOPV         | All                                                                                                                                   |
| April 2001     | tOPV         | All                                                                                                                                   |
| June 2001      | tOPV         | All                                                                                                                                   |
| November 2001  | tOPV         | All                                                                                                                                   |
| January 2002   | tOPV         | All                                                                                                                                   |
| June 2002      | tOPV         | Gombe, Kaduna, Katsina                                                                                                                |
| July 2002      | tOPV         | Bauchi, Borno, FCT, Gombe, Kaduna, Kano, Katsina, Yobe                                                                                |
| October 2002   | tOPV         | All                                                                                                                                   |
| November 2002  | tOPV         | All                                                                                                                                   |
| January 2003   | tOPV         | Bauchi, Borno, Gombe, Jigawa, Kaduna, Kano, Katsina, Yobe                                                                             |
| March 2003     | tOPV         | Kebbi, Niger, Sokoto, Zamfara                                                                                                         |
| April 2003     | tOPV         | Bauchi, Gombe, Jigawa, Kaduna, Kano, Katsina                                                                                          |
| June 2003      | tOPV         | Benue, Kogi, Nasarawa                                                                                                                 |
| August 2003    | tOPV         | Kano                                                                                                                                  |
| September 2003 | tOPV         | Bauchi, Benue, Borno, Gombe, Jigawa, Kaduna, Katsina, Kebbi, Kogi, Nasarawa, Niger, Sokoto, Yobe, Zamfara                             |
| October 2003   | tOPV         | All                                                                                                                                   |
| November 2003  | tOPV         | All                                                                                                                                   |
| December 2003  | tOPV         | FCT, Kano, Lagos, Plateau, Taraba                                                                                                     |
| February 2004  | tOPV         | All except Kano and Zamfara                                                                                                           |
| March 2004     | tOPV         | All except Kano                                                                                                                       |
| September 2004 | tOPV         | Bauchi, Jigawa, Kaduna, Kano, Katsina, Kebbi, Sokoto, Zamfara                                                                         |
| November 2004  | tOPV         | All                                                                                                                                   |
| February 2005  | tOPV         | All                                                                                                                                   |
| April 2005     | tOPV         | All                                                                                                                                   |
| May 2005       | tOPV         | All                                                                                                                                   |
| July 2005      | tOPV         | Benue, FCT, Kogi, Nasarawa                                                                                                            |
| August 2005    | tOPV         | Adamawa, Bauchi, Benue, Borno, FCT, Gombe, Jigawa, Kaduna, Kano, Katsina, Kebbi, Kogi, Nasarawa, Niger, Sokoto, Taraba, Yobe, Zamfara |
| September 2005 | tOPV         | All                                                                                                                                   |
| November 2005  | tOPV         | Adamawa, Bauchi, Benue, Borno, FCT, Gombe, Jigawa, Kaduna, Kano, Katsina, Kebbi, Kogi, Nasarawa, Niger, Sokoto, Taraba, Yobe, Zamfara |
| February 2006  | tOPV         | All except Kebbi, Lagos, Rivers and Taraba                                                                                            |
| February 2006  | mOPV1        | Kebbi, Lagos, Rivers, Taraba                                                                                                          |
| March 2006     | tOPV         | Kebbi, Lagos, Rivers, Taraba                                                                                                          |
| March 2006     | mOPV1        | All except Kebbi, Lagos, Rivers and Taraba                                                                                            |
| May 2006       | mOPV1        | Adamawa, Bauchi, Borno, Jigawa, Kaduna, Kano, Katsina, Kebbi, Sokoto, Yobe, Zamfara                                                   |
| June 2006      | mOPV1        | Adamawa, Bauchi, Borno, Jigawa, Kaduna, Kano, Katsina, Kebbi, Sokoto, Yobe, Zamfara                                                   |
| August 2006    | mOPV1        | Taraba                                                                                                                                |
| September 2006 | mOPV1        | Adamawa, Bauchi, Borno, Jigawa, Kaduna, Kano, Katsina, Kebbi, Sokoto, Yobe, Zamfara                                                   |
| September 2006 | mOPV1        | Taraba                                                                                                                                |
| October 2006   | mOPV1        | Abia, Anambra, Akwa Ibom, Bayelsa, Cross River, Delta,                                                                                |

|                |       |                                                                                                                                                                                                                               |
|----------------|-------|-------------------------------------------------------------------------------------------------------------------------------------------------------------------------------------------------------------------------------|
| November 2006  | tOPV  | Ebonyi, Edo, Ekiti, Enugu, Imo, Lagos, Ogun, Ondo, Osun, Oyo, Rivers<br>Adamawa, Bauchi, Benue, Borno, Gombe, FCT, Jigawa, Kaduna, Kano, Katsina, Kebbi, Kogi, Kwara, Nasarawa, Niger, Plateau, Sokoto, Taraba, Yobe, Zamfara |
| January 2007   | tOPV  | Northern states                                                                                                                                                                                                               |
| January 2007   | mOPV1 | Southern states                                                                                                                                                                                                               |
| March 2007     | tOPV  | Bauchi, Borno, Gombe, Jigawa, Kaduna, Kano, Katsina, Kebbi, Niger, Sokoto, Yobe, Zamfara                                                                                                                                      |
| March 2007     | mOPV1 | 147 highest risk LGAs in 17 states (Bauchi, Benue, Borno, FCT, Gombe, Jigawa, Kaduna, Kano, Katsina, Kebbi, Kogi, Niger, Plateau, Sokoto, Yobe, Zamfara)                                                                      |
| June 2007      | mOPV1 | Bauchi, Borno, Gombe, Jigawa, Kaduna, Kano, Katsina, Kebbi, Niger, Sokoto, Yobe, Zamfara                                                                                                                                      |
| July 2007      | mOPV3 | Bauchi, Borno, FCT, Gombe, Jigawa, Kaduna, Kano, Katsina, Kebbi, Niger, Sokoto, Yobe, Zamfara                                                                                                                                 |
| September 2007 | tOPV  | Bauchi, Borno, Gombe, Jigawa, Kaduna, Kano, Katsina, Kebbi, Niger, Sokoto, Yobe, Zamfara                                                                                                                                      |
| October 2007   | mOPV3 | Adamawa, Lagos, Taraba                                                                                                                                                                                                        |
| November 2007  | mOPV1 | Adamawa, Bauchi, Benue, Borno, Gombe, Jigawa, Kaduna, Kano, Katsina, Kebbi, Kwara, Nasarawa, Niger, Sokoto, Taraba, Yobe, Zamfara                                                                                             |
| December 2007  | mOPV3 | Lagos, Ogun, Oyo                                                                                                                                                                                                              |

**Supplementary Table 3a** Vaccine efficacy estimates by year of onset of paralysis

| Year†   | Type 1 |                                            |                                   |                                  | Type 3 |                                            |                               |
|---------|--------|--------------------------------------------|-----------------------------------|----------------------------------|--------|--------------------------------------------|-------------------------------|
|         | Cases  | Case-control<br>matches, n<br>(% of cases) | mOPV1<br>efficacy (%)<br>(95% CI) | tOPV<br>efficacy (%)<br>(95% CI) | Cases  | Case-control<br>matches, n<br>(% of cases) | tOPV efficacy<br>(%) (95% CI) |
| 2001    | 35     | 0 (0%)                                     | N/A*                              | N/A**                            | 21     | 2 (10%)                                    | N/A**                         |
| 2002    | 174    | 50 (29%)                                   | N/A*                              | 24 (0, 45)                       | 28     | 9 (32%)                                    | N/A**                         |
| 2003    | 190    | 89 (47%)                                   | N/A*                              | 25 (6, 40)                       | 163    | 56 (34%)                                   | 38 (11, 56)                   |
| 2004    | 598    | 332 (56%)                                  | N/A*                              | 14 (2, 24)                       | 181    | 109 (60%)                                  | 14 (0, 29)                    |
| 2005    | 573    | 275 (48%)                                  | N/A*                              | 18 (7, 27)                       | 253    | 134 (53%)                                  | 15 (0, 31)                    |
| 2006    | 846    | 369 (44%)                                  | 80 (53, 92)                       | 9 (0, 20)                        | 276    | 120 (43%)                                  | 13 (0, 30)                    |
| 2007    | 116    | 59 (51%)                                   | 34 (0, 77)                        | 30 (0, 58)                       | 170    | 72 (42%)                                   | 15 (0, 36)                    |
| Overall | 2532   | 1174 (46%)                                 | 67 (39, 82)                       | 16 (10, 21)                      | 1092   | 502 (46%)                                  | 18 (9, 26)                    |

†mid-point between date of onset of paralysis for case and control; \*mOPV1 was introduced only in 2006; \*\*Numbers were too small to estimate efficacy

**Supplementary Table 3b** Vaccine efficacy estimates by age at onset of paralysis

| Age<br>(years)†      | Type 1 |                                            |                                   |                                  | Type 3 |                                            |                               |
|----------------------|--------|--------------------------------------------|-----------------------------------|----------------------------------|--------|--------------------------------------------|-------------------------------|
|                      | Cases  | Case-control<br>matches, n<br>(% of cases) | mOPV1<br>efficacy (%)<br>(95% CI) | tOPV<br>efficacy (%)<br>(95% CI) | Cases  | Case-control<br>matches, n<br>(% of cases) | tOPV efficacy<br>(%) (95% CI) |
| <1                   | 133    | 45 (34%)                                   | 64 (0, 96)                        | 0 (0, 26)                        | 56     | 16 (29%)                                   | 16 (0, 53)                    |
| 1-2                  | 922    | 520 (56%)                                  | 49 (0, 77)                        | 19 (11, 27)                      | 339    | 184 (54%)                                  | 10 (0, 24)                    |
| 2-3                  | 755    | 426 (56%)                                  | 75 (22, 92)                       | 13 (3, 22)                       | 348    | 205 (59%)                                  | 20 (8, 31)                    |
| 3-4                  | 318    | 129 (41%)                                  | 99 (55, 100)                      | 13 (0, 28)                       | 151    | 70 (46%)                                   | 29 (2, 49)                    |
| 4-5                  | 108    | 34 (31%)                                   | 0 (0, 95)                         | 23 (0, 48)                       | 59     | 20 (34%)                                   | 29 (0, 65)                    |
| >5                   | 94     | 20 (21%)                                   | N/A**                             | 16 (0, 48)                       | 60     | 7 (12%)                                    | 13 (0, 69)                    |
| Missing<br>age data* | 202    |                                            |                                   |                                  | 79     |                                            |                               |
| Overall              | 2532   | 1174 (46%)                                 | 67 (39, 82)                       | 16 (10, 21)                      | 1092   | 502 (46%)                                  | 18 (9, 26)                    |

†mid-point between age at onset of paralysis for case and control; \*these cases were excluded from the analysis as cases and controls were matched on age; \*\*Numbers were too small to estimate efficacy

**Supplementary Table 4** Estimated efficacies of the oral polio vaccines against paralysis from wild poliovirus types 1 and 3 in Nigeria, 2001- 2007. Controls matched to cases based on (a) age at onset of paralysis within 6 months, (b) date of onset of paralysis within 5 months, (c) LGA of residence.

| Location      | Type 1 |                      |                             |                            | Type 3 |                      |                            |
|---------------|--------|----------------------|-----------------------------|----------------------------|--------|----------------------|----------------------------|
|               | Cases  | Case-control matches | mOPV1 efficacy (%) (95% CI) | tOPV efficacy (%) (95% CI) | Cases  | Case-control matches | tOPV efficacy (%) (95% CI) |
| North West    | 1899   | 861                  | 56 (9, 79)                  | 14 (7, 20)                 | 851    | 371                  | 15 (5, 25)                 |
| North East    | 437    | 147                  | 55 (0, 87)                  | 22 (5, 36)                 | 173    | 67                   | 18 (0, 40)                 |
| North Central | 154    | 65                   | 100 (0, 100)                | 22 (0, 40)                 | 52     | 16                   | 24 (0, 56)                 |
| South         | 42     | 21                   | N/A*                        | 50 (0, 77)                 | 16     | 8                    | 12 (0, 54)                 |
| Overall       | 2532   | 1094                 | 61 (26, 79)                 | 16 (10, 22)                | 1092   | 462                  | 16 (7, 25)                 |

\*There have been no reported type 1 cases in the South since the introduction of mOPV1

**Supplementary Table 5** Estimated efficacy of tOPV and mOPV1 assuming randomly selected cases and controls, or cases only, received 3 doses of tOPV through routine services. The estimated fraction of children receiving 3 doses through routine services was based on the National Immunisation Coverage Survey<sup>4</sup>. See the Supplementary Methods for further details.

| Randomly chosen recipients of routine tOPV | Percentile*      | mOPV1 efficacy (%)<br>(95% CI) | tOPV efficacy (%)<br>(95% CI) |
|--------------------------------------------|------------------|--------------------------------|-------------------------------|
| Cases and controls                         | 5 <sup>th</sup>  | 50 (17, 71)                    | 16.1 (10.3, 21.5)             |
|                                            | 50 <sup>th</sup> | 60 (30, 77)                    | 16.8 (11.1, 22.1)             |
|                                            | 95 <sup>th</sup> | 70 (46, 83)                    | 17.6 (11.9, 22.9)             |
| Polio cases only                           | 5 <sup>th</sup>  | 78 (59, 88)                    | 13.9 (8.1, 19.4)              |
|                                            | 50 <sup>th</sup> | 83 (67, 91)                    | 14.5 (8.6, 19.9)              |
|                                            | 95 <sup>th</sup> | 88 (75, 94)                    | 14.9 (9.1, 20.4)              |

\*based on rank after the analysis was repeated 100 times

**Supplementary Table 6** The estimated percentages of the population (aged under 5 years old) that are protected against paralysis from type 1 polio from direct immunisation by year and state. These figures are presented graphically in Figure 1 of the main text and are calculated using (eq. 2) in the Supplementary Methods assuming vaccine efficacy estimates do not vary across the country.

| Zone                 | State       | Year      |           |           |           |           |           |           |
|----------------------|-------------|-----------|-----------|-----------|-----------|-----------|-----------|-----------|
|                      |             | 2001      | 2002      | 2003      | 2004      | 2005      | 2006      | 2007      |
| North West           | Jigawa      | 18        | 27        | 22        | 12        | 13        | 25        | 40        |
|                      | Kaduna      | 35        | 30        | 31        | 26        | 24        | 49        | 65        |
|                      | Kano        | 34        | 29        | 24        | 9         | 16        | 28        | 54        |
|                      | Katsina     | 30        | 31        | 24        | 25        | 22        | 28        | 48        |
|                      | Kebbi       | 30        | 35        | 39        | 32        | 40        | 55        | 70        |
|                      | Sokoto      | 40        | 27        | 32        | 23        | 26        | 62        | 60        |
|                      | Zamfara     | 28        | 37        | 39        | 25        | 13        | 36        | 54        |
| <b>NORTH WEST</b>    |             | <b>31</b> | <b>30</b> | <b>29</b> | <b>20</b> | <b>22</b> | <b>38</b> | <b>55</b> |
| North East           | Adamawa     | 39        | 43        | 35        | 31        | 40        | 63        | 64        |
|                      | Bauchi      | 36        | 28        | 34        | 18        | 20        | 54        | 59        |
|                      | Borno       | 19        | 28        | 26        | 21        | 21        | 43        | 56        |
|                      | Gombe       | 26        | 34        | 42        | 31        | 43        | 53        | 75        |
|                      | Taraba      | 24        | 38        | 33        | 39        | 47        | 60        | 58        |
|                      | Yobe        | 32        | 29        | 32        | 35        | 34        | 45        | 48        |
| <b>NORTH EAST</b>    |             | <b>30</b> | <b>33</b> | <b>33</b> | <b>27</b> | <b>31</b> | <b>53</b> | <b>60</b> |
| North Central        | Benue       | 37        | 37        | 41        | 39        | 54        | 71        | 61        |
|                      | FCT         | 44        | 48        | 52        | 54        | 46        | 69        | 71        |
|                      | Kogi        | 46        | 41        | 44        | 46        | 46        | 65        | 65        |
|                      | Kwara       | 44        | 45        | 45        | 43        | 54        | 53        | 59        |
|                      | Nasarawa    | 37        | 44        | 46        | 49        | 53        | 63        | 74        |
|                      | Niger       | 41        | 44        | 44        | 43        | 48        | 62        | 77        |
|                      | Plateau     | 39        | 36        | 31        | 33        | 41        | 50        | 48        |
| <b>NORTH CENTRAL</b> |             | <b>41</b> | <b>41</b> | <b>42</b> | <b>42</b> | <b>49</b> | <b>62</b> | <b>64</b> |
| South West           | Ekiti       | 46        | 55        | 45        | 48        | 50        | 61        | 72        |
|                      | Lagos       | 45        | 49        | 52        | 59        | 64        | 75        | 85        |
|                      | Ogun        | 51        | 42        | 53        | 54        | 62        | 82        | 89        |
|                      | Ondo        | 39        | 48        | 51        | 48        | 48        | 61        | 79        |
|                      | Osun        | 36        | 40        | 48        | 42        | 52        | 58        | 75        |
|                      | Oyo         | 40        | 46        | 44        | 44        | 49        | 70        | 75        |
| <b>SOUTH WEST</b>    |             | <b>43</b> | <b>47</b> | <b>49</b> | <b>51</b> | <b>56</b> | <b>70</b> | <b>81</b> |
| South South          | Akwa Ibom   | 31        | 31        | 45        | 39        | 48        | 68        | 77        |
|                      | Bayelsa     | 27        | 40        | 31        | 35        | 55        | 63        | 78        |
|                      | Cross River | 37        | 46        | 50        | 53        | 69        | 69        | 78        |
|                      | Delta       | 43        | 40        | 41        | 42        | 51        | 72        | 73        |
|                      | Edo         | 34        | 52        | 41        | 54        | 59        | 69        | 87        |
|                      | Rivers      | 45        | 37        | 43        | 42        | 44        | 72        | 81        |
| <b>SOUTH SOUTH</b>   |             | <b>38</b> | <b>40</b> | <b>43</b> | <b>44</b> | <b>53</b> | <b>70</b> | <b>79</b> |
| South East           | Abia        | 36        | 48        | 51        | 50        | 57        | 70        | 71        |
|                      | Anambra     | 46        | 42        | 43        | 48        | 55        | 62        | 68        |
|                      | Ebonyi      | 39        | 44        | 38        | 39        | 40        | 58        | 51        |
|                      | Enugu       | 49        | 42        | 55        | 40        | 50        | 60        | 67        |
|                      | Imo         | 41        | 40        | 42        | 43        | 44        | 65        | 73        |
| <b>SOUTH EAST</b>    |             | <b>43</b> | <b>43</b> | <b>46</b> | <b>44</b> | <b>50</b> | <b>63</b> | <b>67</b> |

**Supplementary Table 7** Estimated population immunity levels from direct vaccination against paralysis from type 1 polio, 2005-7 calculated assuming that all SIA used tOPV. Also shown are the resulting changes in immunity due to coverage changes, the actual changes seen 2005-7 (from data in Supplementary Table 6) and therefore the fraction of the improvement in vaccine-induced immunity that resulted from the introduction of mOPV1

| Zone                 | State       | Assuming no mOPV1 |           |           | Change from 2005 to 2007 due to coverage changes | Estimated total change from 2005 to 2007 | Improvement due to use of mOPV1 (% of total change) |
|----------------------|-------------|-------------------|-----------|-----------|--------------------------------------------------|------------------------------------------|-----------------------------------------------------|
|                      |             | 2005              | 2006      | 2007      |                                                  |                                          |                                                     |
| North West           | Jigawa      | 13                | 16        | 21        | 8                                                | 27                                       | 19 (70)                                             |
|                      | Kaduna      | 24                | 32        | 41        | 17                                               | 41                                       | 24 (59)                                             |
|                      | Kano        | 16                | 20        | 34        | 18                                               | 38                                       | 20 (53)                                             |
|                      | Katsina     | 22                | 19        | 26        | 4                                                | 26                                       | 22 (85)                                             |
|                      | Kebbi       | 40                | 41        | 42        | 2                                                | 30                                       | 28 (93)                                             |
|                      | Sokoto      | 26                | 37        | 33        | 7                                                | 34                                       | 27 (79)                                             |
|                      | Zamfara     | 13                | 25        | 29        | 16                                               | 41                                       | 25 (61)                                             |
| <b>NORTH WEST</b>    |             | <b>22</b>         | <b>25</b> | <b>33</b> | <b>11</b>                                        | <b>33</b>                                | <b>22 (67)</b>                                      |
| North East           | Adamawa     | 40                | 42        | 41        | 1                                                | 24                                       | 23 (96)                                             |
|                      | Bauchi      | 20                | 36        | 35        | 15                                               | 39                                       | 24 (62)                                             |
|                      | Borno       | 21                | 31        | 32        | 11                                               | 35                                       | 24 (69)                                             |
|                      | Gombe       | 43                | 43        | 55        | 12                                               | 32                                       | 20 (63)                                             |
|                      | Taraba      | 47                | 47        | 40        | -7                                               | 11                                       | 18 (100)                                            |
|                      | Yobe        | 34                | 30        | 27        | -7                                               | 14                                       | 21 (100)                                            |
| <b>NORTH EAST</b>    |             | <b>31</b>         | <b>37</b> | <b>37</b> | <b>6</b>                                         | <b>29</b>                                | <b>23 (79)</b>                                      |
| North Central        | Benue       | 54                | 60        | 52        | -2                                               | 7                                        | 9 (100)                                             |
|                      | FCT         | 46                | 58        | 50        | 4                                                | 25                                       | 21 (84)                                             |
|                      | Kogi        | 46                | 54        | 54        | 8                                                | 19                                       | 11 (58)                                             |
|                      | Kwara       | 54                | 39        | 47        | -7                                               | 5                                        | 12 (100)                                            |
|                      | Nasarawa    | 53                | 54        | 56        | 3                                                | 21                                       | 18 (86)                                             |
|                      | Niger       | 48                | 52        | 53        | 5                                                | 29                                       | 24(83)                                              |
|                      | Plateau     | 41                | 38        | 35        | -6                                               | 7                                        | 13 (100)                                            |
| <b>NORTH CENTRAL</b> |             | <b>49</b>         | <b>51</b> | <b>49</b> | <b>0</b>                                         | <b>15</b>                                | <b>15 (100)</b>                                     |
| South West           | Ekiti       | 50                | 46        | 50        | 0                                                | 22                                       | 22 (100)                                            |
|                      | Lagos       | 64                | 64        | 63        | -1                                               | 21                                       | 22 (100)                                            |
|                      | Ogun        | 62                | 68        | 69        | 7                                                | 27                                       | 20 (74)                                             |
|                      | Ondo        | 48                | 49        | 51        | 3                                                | 31                                       | 28 (90)                                             |
|                      | Osun        | 52                | 49        | 52        | 0                                                | 23                                       | 23 (100)                                            |
|                      | Oyo         | 49                | 55        | 48        | -1                                               | 26                                       | 27 (100)                                            |
| <b>SOUTH WEST</b>    |             | <b>56</b>         | <b>57</b> | <b>56</b> | <b>0</b>                                         | <b>25</b>                                | <b>25 (100)</b>                                     |
| South South          | Akwa Ibom   | 48                | 53        | 46        | -2                                               | 29                                       | 31 (100)                                            |
|                      | Bayelsa     | 55                | 51        | 49        | -6                                               | 23                                       | 29 (100)                                            |
|                      | Cross River | 69                | 57        | 51        | -18                                              | 9                                        | 27 (100)                                            |
|                      | Delta       | 51                | 57        | 47        | -4                                               | 22                                       | 26 (100)                                            |
|                      | Edo         | 59                | 58        | 59        | 0                                                | 28                                       | 28 (100)                                            |
|                      | Rivers      | 44                | 51        | 49        | 5                                                | 37                                       | 32 (86)                                             |
| <b>SOUTH SOUTH</b>   |             | <b>53</b>         | <b>55</b> | <b>50</b> | <b>-3</b>                                        | <b>26</b>                                | <b>29 (100)</b>                                     |
| South East           | Abia        | 57                | 56        | 43        | -14                                              | 14                                       | 28 (100)                                            |
|                      | Anambra     | 55                | 46        | 43        | -12                                              | 13                                       | 25 (100)                                            |
|                      | Ebonyi      | 40                | 41        | 33        | -7                                               | 11                                       | 18 (100)                                            |
|                      | Enugu       | 50                | 47        | 38        | -12                                              | 17                                       | 29 (100)                                            |
|                      | Imo         | 44                | 51        | 45        | 1                                                | 29                                       | 28 (97)                                             |
| <b>SOUTH EAST</b>    |             | <b>50</b>         | <b>48</b> | <b>41</b> | <b>-9</b>                                        | <b>17</b>                                | <b>26 (100)</b>                                     |

**Supplementary Table 8** Spearman’s rank correlation coefficient, by year, measuring correlation between the proportions of the population (under 5 years) protected by vaccination and incidence of reported type 1 cases. Data are grouped by state of residence.

| Year | Spearman’s rank correlation coefficient (95% CI) | P-value | Spearman’s rank correlation coefficient (95% CI) |
|------|--------------------------------------------------|---------|--------------------------------------------------|
| 2001 | 0.43 (0.12, 0.66)                                | 0.007   | 2001-3 combined:<br>0.38 (0.21, 0.53)*           |
| 2002 | 0.51 (0.22, 0.71)                                | 0.001   |                                                  |
| 2003 | 0.39 (0.07, 0.63)                                | 0.016   |                                                  |
| 2004 | 0.62 (0.36, 0.78)                                | <0.001  | 2004-7 combined:<br>0.61 (0.49, 0.70)*           |
| 2005 | 0.71 (0.50, 0.84)                                | <0.001  |                                                  |
| 2006 | 0.75 (0.55, 0.86)                                | <0.001  |                                                  |
| 2007 | 0.54 (0.26, 0.73)                                | <0.001  |                                                  |

\*Correlation post-2003 significantly higher than in earlier years (p = 0.023).

**Supplementary Table 9a** Characteristics of all and matched type 1 polio cases

|                    | Cases* n (%)<br>(n=2469) | Cases with necessary<br>data** n (%)<br>(n=2171) | Case-control<br>matches n (%)<br>(n=1174) |
|--------------------|--------------------------|--------------------------------------------------|-------------------------------------------|
| <b>Age (years)</b> |                          |                                                  |                                           |
| <1                 | 128 (5%)                 | 116 (5%)                                         | 58 (5%)                                   |
| 1-2                | 890 (39%)                | 858 (40%)                                        | 536 (46%)                                 |
| 2-3                | 744 (33%)                | 721 (33%)                                        | 406 (35%)                                 |
| 3-4                | 308 (14%)                | 294 (14%)                                        | 123 (10%)                                 |
| 4-5                | 107 (5%)                 | 97 (4%)                                          | 31 (3%)                                   |
| 5+                 | 92 (4%)                  | 85 (4%)                                          | 20 (2%)                                   |
| Missing            | 200 (8%)                 |                                                  |                                           |
| <b>Location</b>    |                          |                                                  |                                           |
| North West         | 1861 (75%)               | 1663 (77%)                                       | 925 (79%)                                 |
| North East         | 421 (17%)                | 340 (16%)                                        | 158 (13%)                                 |
| North Central      | 147 (6%)                 | 134 (6%)                                         | 68 (6%)                                   |
| South              | 40 (1%)                  | 34 (2%)                                          | 23 (2%)                                   |
| <b>Period</b>      |                          |                                                  |                                           |
| 2001-2003          | 379 (15%)                | 320 (15%)                                        | 148 (13%)                                 |
| 2004-2007          | 2090 (86%)               | 1851 (85%)                                       | 1026 (87%)                                |
| Exposed to mOPV1   | 488 (20%)                | 469 (22%)                                        | 237 (20%)                                 |

\*These case numbers exclude those excreting vaccine virus since these were excluded from our case-control studies

\*\*Necessary data = reported doses and age at onset of paralysis

**Supplementary Table 9b** Characteristics of all and matched type 3 polio cases

|                    | Cases* n (%)<br>(n=1070) | Cases with necessary<br>data** n (%) (n=946) | Case-control<br>matches n (%)<br>(n=502) |
|--------------------|--------------------------|----------------------------------------------|------------------------------------------|
| <b>Age (years)</b> |                          |                                              |                                          |
| <1                 | 54 (5%)                  | 53 (6%)                                      | 22 (4%)                                  |
| 1-2                | 327 (33%)                | 315 (33%)                                    | 191 (38%)                                |
| 2-3                | 342 (35%)                | 326 (34%)                                    | 198 (39%)                                |
| 3-4                | 149 (15%)                | 143 (15%)                                    | 64 (13%)                                 |
| 4-5                | 59 (6%)                  | 56 (6%)                                      | 20 (4%)                                  |
| 5+                 | 60 (6%)                  | 53 (6%)                                      | 7 (1%)                                   |
| Missing            | 79 (7%)                  |                                              |                                          |
| <b>Location</b>    |                          |                                              |                                          |
| North West         | 835 (78%)                | 743 (79%)                                    | 402 (80%)                                |
| North East         | 170 (16%)                | 148 (16%)                                    | 74 (15%)                                 |
| North Central      | 50 (5%)                  | 41 (4%)                                      | 18 (4%)                                  |
| South              | 15 (1%)                  | 14 (1%)                                      | 8 (1%)                                   |
| <b>Period</b>      |                          |                                              |                                          |
| 2001-2003          | 205 (19%)                | 180 (19%)                                    | 74 (15%)                                 |
| 2004-2007          | 865 (81%)                | 766 (81%)                                    | 428 (85%)                                |
| Exposed to mOPV1   | 331 (31%)                | 322 (34%)                                    | 171 (35%)                                |

\*These case numbers exclude those excreting vaccine virus since these were excluded from our case-control studies

\*\*Necessary data = reported doses and age at onset of paralysis

**Supplementary Figure 1** Flow chart illustrating the total number of Acute Flaccid Paralysis (AFP) cases in the surveillance database (2001-7)

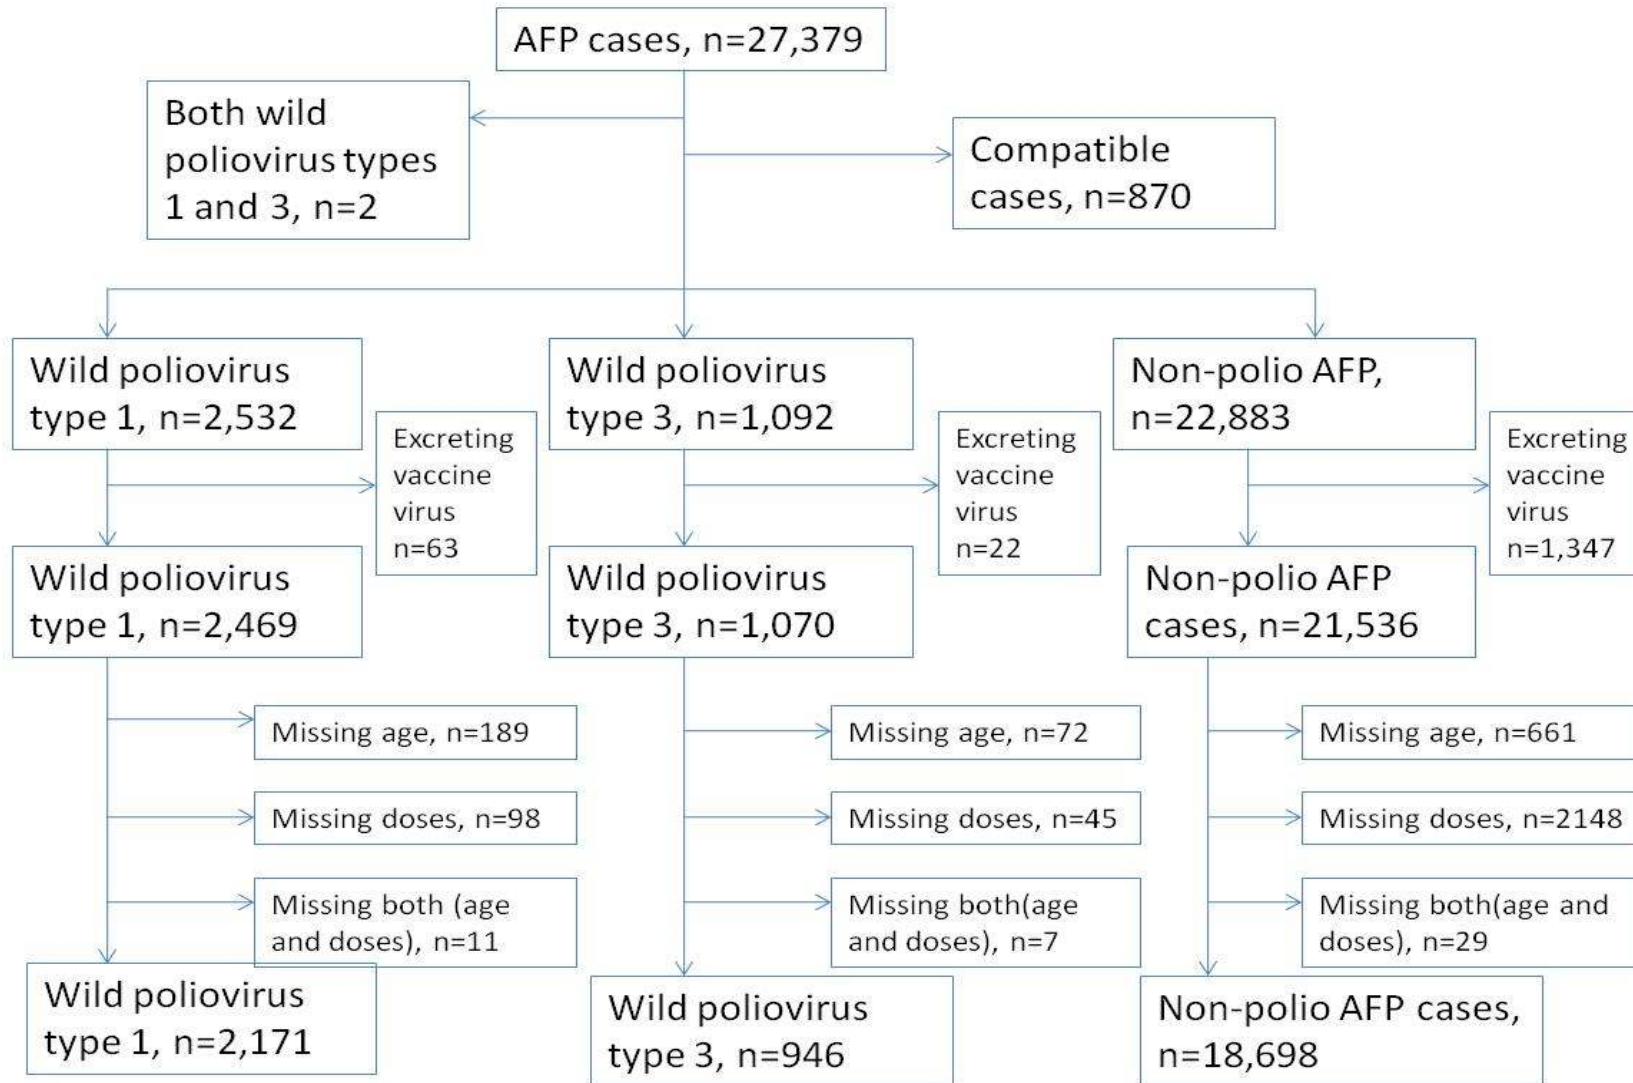

**Supplementary Figure 2** Odds of being a type 1 paralytic polio case by estimated number of doses received of: (a) trivalent oral polio vaccine (only up to 8 doses shown), (b) monovalent oral polio vaccine (only up to 2.5 doses shown). Odds of being a type 3 paralytic polio case number of doses received of: (c) trivalent oral polio vaccine (only up to 6 doses shown). Error bars indicate 95% confidence intervals. The curved line represents the relationship between odds of being a case and doses when a log linear relationship is assumed.

(a)

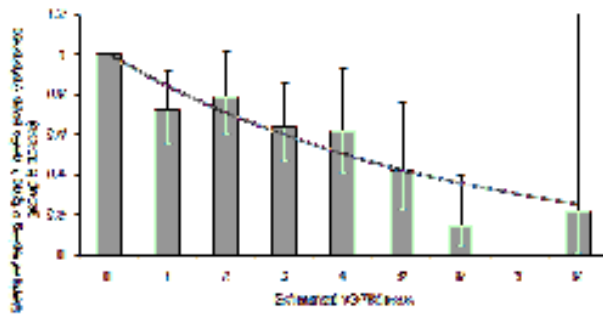

(b)

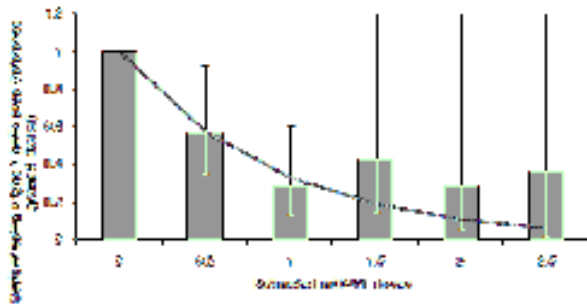

(c)

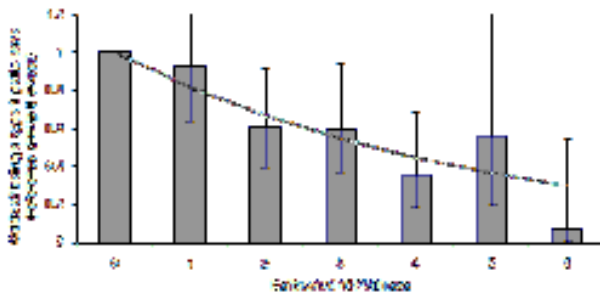

Supplement: nejm_jenkins_1666sa1.pdf [file nejm_jenkins_1666sa1.pdf]
